# Supplementary material
Source: PubMed Central journal article supplement (PMC2525615)
Supplement: NIHMS62238-supplement-2.pdf [file NIHMS62238-supplement-2.pdf]

[Supporting information to accompany]  
**Supramolecular Allosteric Cofacial Porphyrin Complexes**

Christopher G. Oliveri<sup>†</sup>, Nathan C. Gianneschi<sup>†</sup>, SonBinh T. Nguyen<sup>†\*</sup>, Chad A. Mirkin<sup>†\*</sup>, Charlotte L. Stern<sup>†</sup>, Zdzislaw Wawrzak<sup>‡</sup> and Maren Pink

<sup>†</sup> Department of Chemistry and the Institute for Nanotechnology, Northwestern University, 2145 Sheridan Road, Evanston, Illinois, 60208-3113, U.S.A.

<sup>‡</sup> Department of Biochemistry, Molecular Biology and Cell Biology, Northwestern University, 2205 Tech Drive, Evanston, Illinois 60208-3500, U.S.A.

<sup>§</sup> Department of Chemistry, Indiana University, Bloomington, Indiana 47405, U.S.A.

**Figure S1.** X-ray crystal structure of **8cCDABCO**.

**Figure S2.** X-ray crystal structure of **15cCDABCO**.

**Table S1.** Crystallographic data for structures **8cCDABCO** and **15cCDABCO**.

**Figure S3.** Uncorrected catalytic data for 2-PC with **14a** and **15a**.

**Figure S4.** Background reactions for 2-PC with **[Zn(TPP) + 16a]** and **[Zn(TPP) + 16b]**.

**Figure S5.** Uncorrected catalytic data for 3-PC with **14a** and **15a**.

**Figure S6.** Background reactions for 3-PC with **[Zn(TPP) + 16a]** and **[Zn(TPP) + 16b]**.

**Figure S7.** Uncorrected catalytic data for 4-PC with **14a** and **15a**.

**Figure S8.** Background reactions for 4-PC with **[Zn(TPP) + 16a]** and **[Zn(TPP) + 16b]**.

Crystallographic data in CIF format can be found via the Internet at <http://pubs.acs.org>.

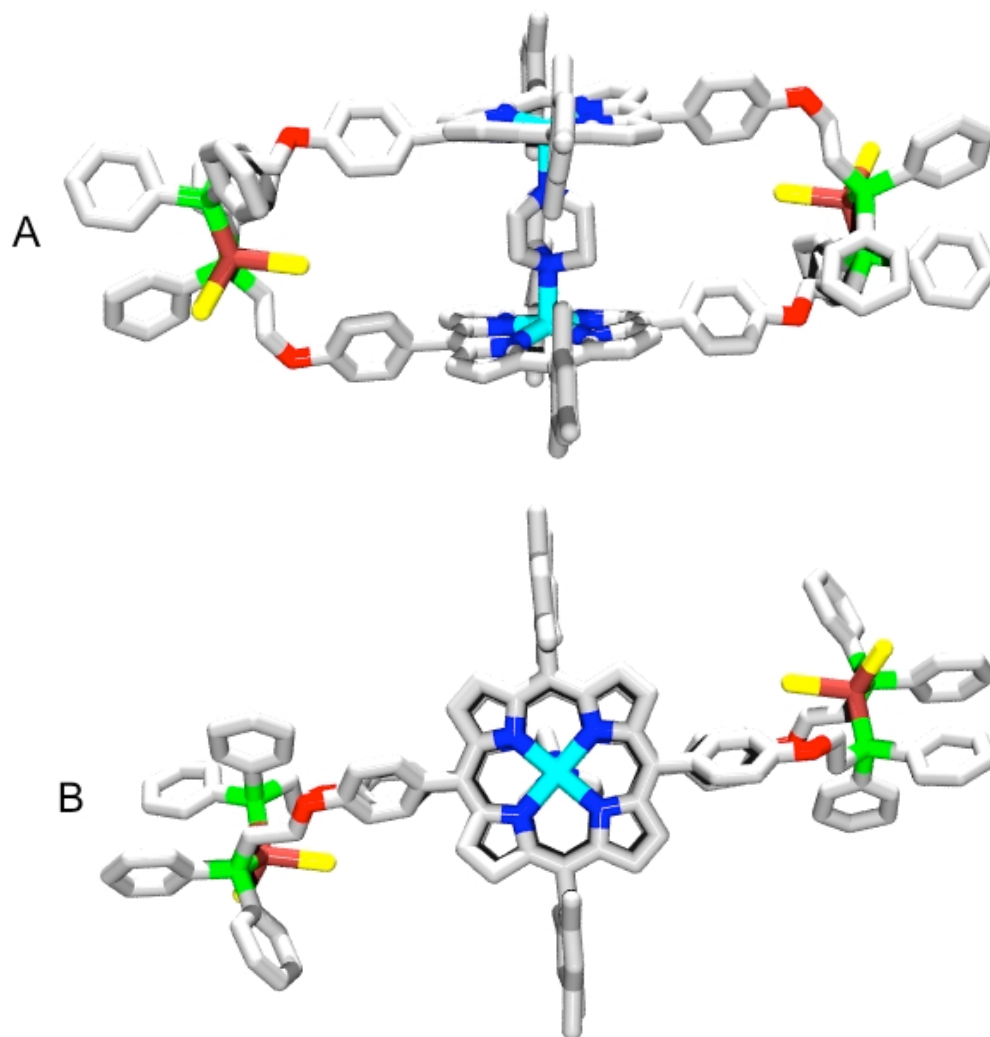

**Figure S1.** Graphic representations of the X-ray crystal structure of **8cCDABCO** as viewed from the side (A) and from the top (B) containing a molecule of DABCO bridging both Zn atoms. Hydrogen atoms, disordered DABCO carbon atoms, and solvent molecules have been omitted for clarity. Zn-Zn distance: 6.99 Å. Cu-Cu distance: 22.6 Å. Gray = Carbon, Brown = Cu, Red = O, Yellow = Cl, Green = P, Blue = N, Light Blue = Zn.

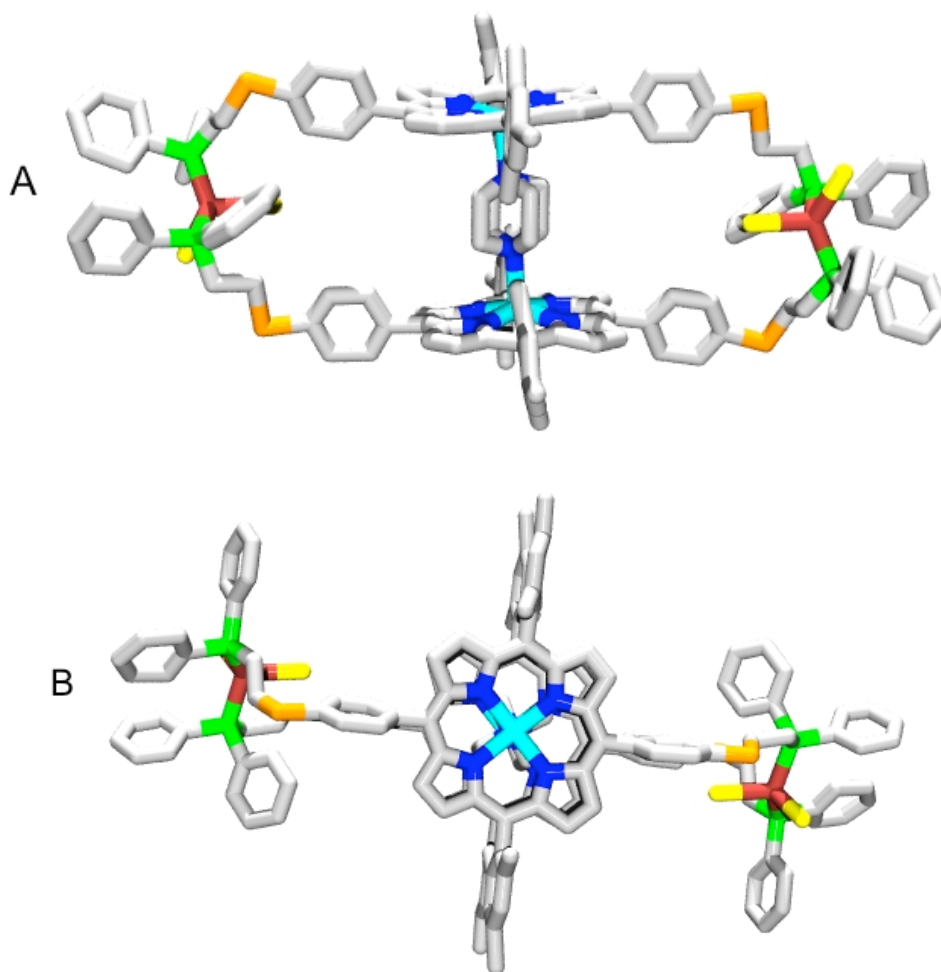

**Figure S2.** Graphic representations of the X-ray crystal structure of **15cCDABCO** as viewed from the side (A) and from the top (B) containing a molecule of DABCO bridging both Zn atoms. Hydrogen atoms, disordered DABCO carbon atoms, and solvent molecules have been omitted for clarity. Zn-Zn distance: 7.05 Å. Cu-Cu distance: 22.3 Å. Gray = C, Brown = Cu, Red = O, Orange = S, Yellow = Cl, Green = P, Dark Blue = N, Light Blue = Zn.

**Table 1.** X-ray Crystallographic Data for **8cCDABCO** and **15cCDABCO**.

|                                   | <b>8cCDABCO</b>                                                                                                                 | <b>15cCDABCO</b>                                                                                                                |
|-----------------------------------|---------------------------------------------------------------------------------------------------------------------------------|---------------------------------------------------------------------------------------------------------------------------------|
| Empirical formula                 | C <sub>174</sub> H <sub>136</sub> Cl <sub>4</sub> Cu <sub>2</sub> N <sub>14</sub> O <sub>4</sub> P <sub>4</sub> Zn <sub>2</sub> | C <sub>172</sub> H <sub>156</sub> Cl <sub>4</sub> Cu <sub>2</sub> N <sub>14</sub> P <sub>4</sub> S <sub>4</sub> Zn <sub>2</sub> |
| Formula weight                    | 3010.46                                                                                                                         | 3094.86                                                                                                                         |
| Temperature                       | 153(2) K                                                                                                                        | 153(2) K                                                                                                                        |
| Wavelength                        | 0.71000 Å                                                                                                                       | 0.71073 Å                                                                                                                       |
| Crystal system, space group       | Triclinic, P-1                                                                                                                  | Triclinic, P-1                                                                                                                  |
| Unit cell dimensions              | a = 13.127(9) Å α =<br>97.501(6)°<br>b = 16.349(8) Å β =<br>96.354(14)°<br>c = 22.544(12) Å<br>γ = 100.273(10)°                 | a = 13.283(3) Å<br>α = 89.34(3)<br>b = 17.340(4) Å<br>β = 89.58(3)°<br>c = 22.330(5) Å<br>γ = 73.30(3)°                         |
| Volume                            | 4675(5) Å <sup>3</sup>                                                                                                          | 4926.0(17) Å <sup>3</sup>                                                                                                       |
| Z, Calculated density             | 1, 1.065 Mg/m <sup>3</sup>                                                                                                      | 1, 1.043 Mg/m <sup>3</sup>                                                                                                      |
| Absorption coefficient            | 0.618 mm <sup>-1</sup>                                                                                                          | 0.628 mm <sup>-1</sup>                                                                                                          |
| F(000)                            | 1550                                                                                                                            | 1608                                                                                                                            |
| Crystal size                      | 0.080 x 0.040 x 0.010 mm                                                                                                        | 0.060 x 0.040 x 0.010 mm                                                                                                        |
| Theta range for data collection   | 2.06 to 21.93 °                                                                                                                 | 1.9 to 21.9 °                                                                                                                   |
| Reflections collected / unique    | 45189 / 10805 [R(int) =<br>0.0712]                                                                                              | 33613 / 8598 [R(int) = 0.083]                                                                                                   |
| Refinement method                 | Full-matrix least-squares on F <sup>2</sup>                                                                                     | Full-matrix least-squares on<br>F <sup>2</sup>                                                                                  |
| Data / restraints / parameters    | 10756 / 0 / 887                                                                                                                 | 10326 / 0 / 909                                                                                                                 |
| Goodness-of-fit on F <sup>2</sup> | 0.984                                                                                                                           | 0.863                                                                                                                           |
| Final R indices [I > 2σ(I)]       | R1 = 0.1117, wR2 = 0.2676                                                                                                       | R1 = 0.0910, wR2 = 0.2107                                                                                                       |
| R indices (all data)              | R1 = 0.1591, wR2 = 0.2846                                                                                                       | R1 = 0.1562, wR2 = 0.2311                                                                                                       |

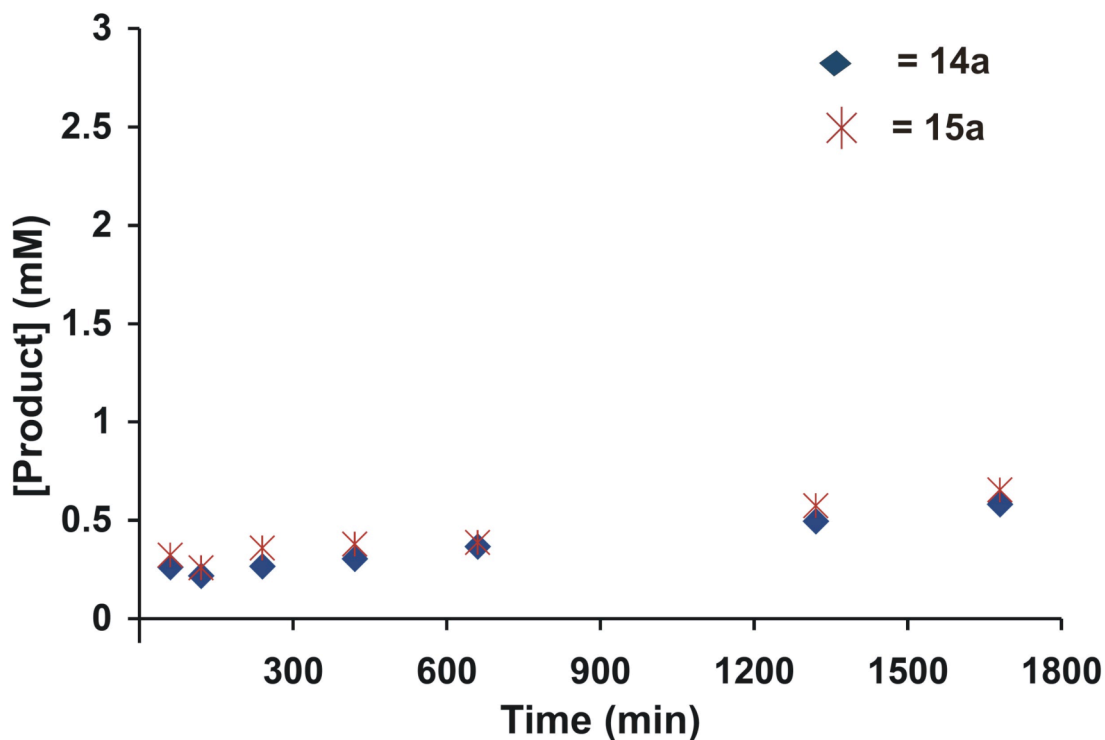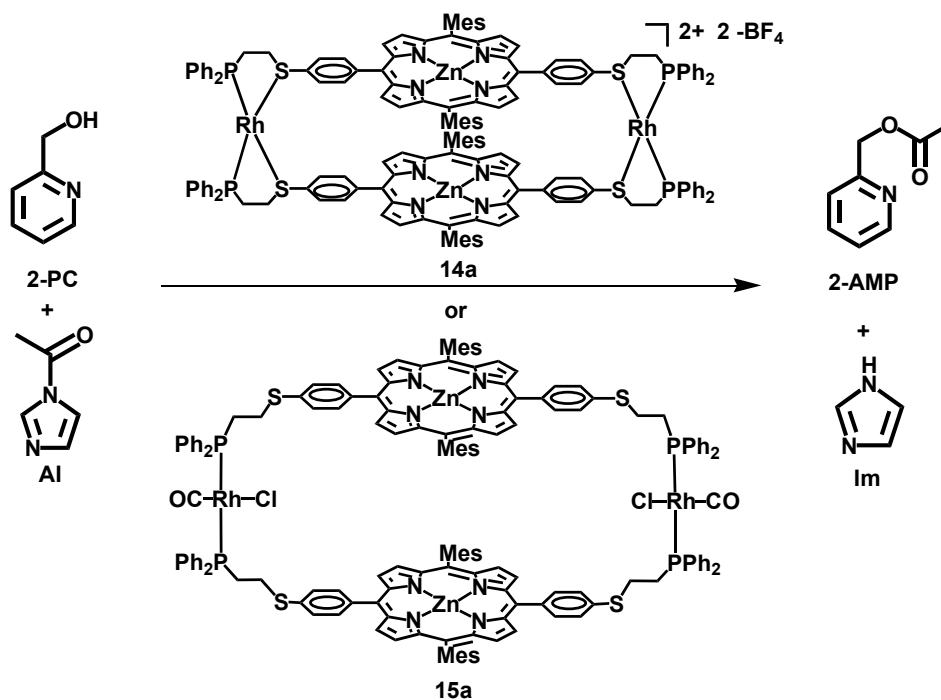

**Figure S3.** Formation of 2-(acetoxymethyl)pyridine (2-AMP) plotted as concentration vs. time for **14a** and **15a**. All data are uncorrected for background reactions. Conditions:  $CH_2Cl_2$ , rt, 9 mM 2-pyridylcarbinol (2-PC), 6 mM 1-acetylimidazole (AI), 2.5 mM biphenyl (GC reference standard), and 0.3 mM supramolecular catalyst (**14a** or **15a**). CO (1 atm) and appropriate amounts of benzyltriethylammonium chloride when indicated.

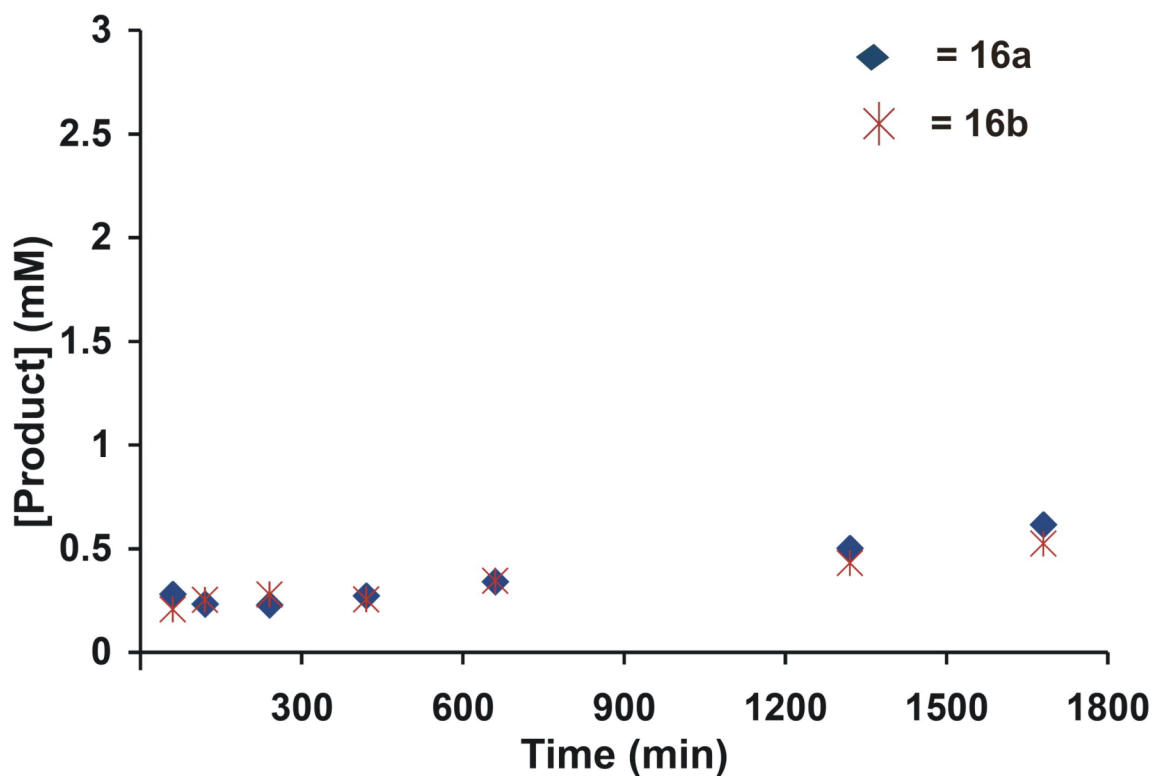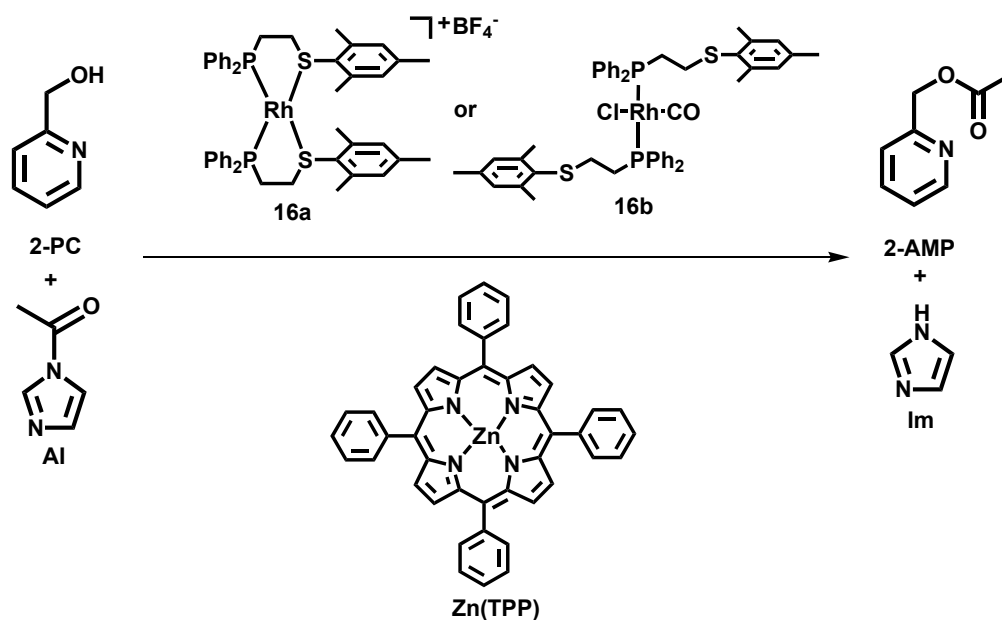

**Figure S4.** Formation 2-(acetoxymethyl)pyridine (2-AMP) plotted as concentration vs. time for [Zn(TPP) + 16a] and [Zn(TPP) + 16b]. Conditions:  $\text{CH}_2\text{Cl}_2$ , rt, 9 mM 2-pyridylcarbinol (2-PC), 6 mM 1-acetylimidazole (AI), 2.5 mM biphenyl (GC reference standard), 0.6 mM  $\text{Rh}^{\text{I}}$ -monomer (16a or 16b), and 0.6 mM Zn(TPP). CO (1 atm) and appropriate amounts of benzyltriethylammonium chloride when indicated.

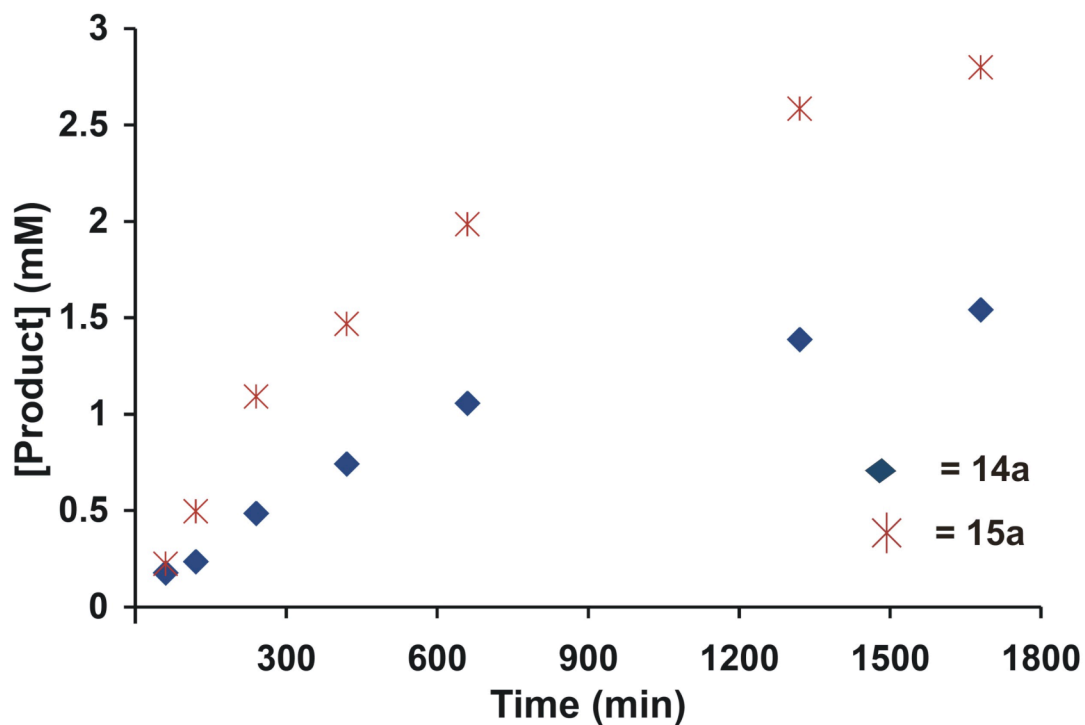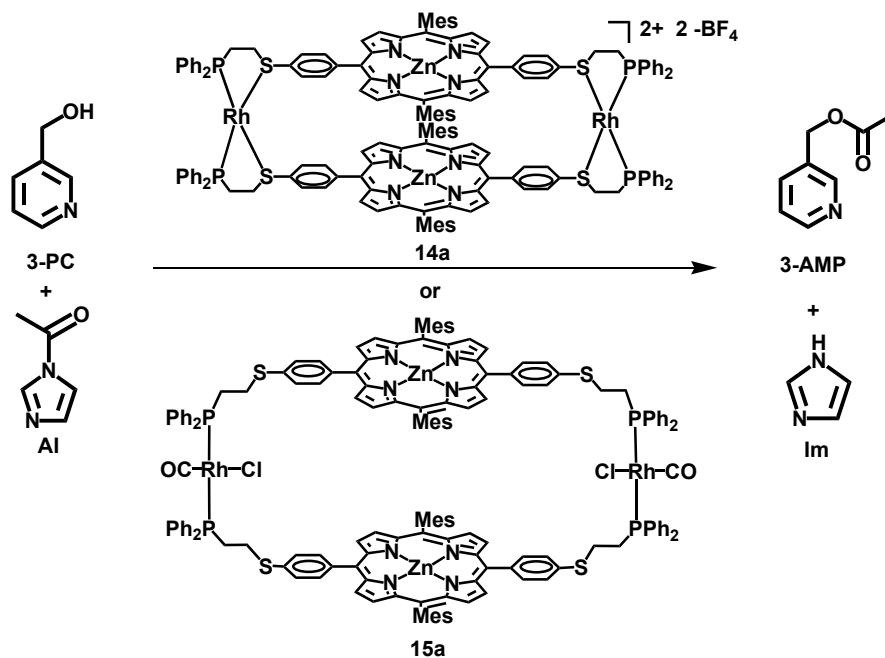

**Figure S5.** Formation of 3-(acetoxymethyl)pyridine (3-AMP) plotted as concentration vs. time for **14a** and **15a**. All data are uncorrected for background reactions. Conditions: CH<sub>2</sub>Cl<sub>2</sub>, rt, 9 mM 3-pyridylcarbinol (3-PC), 6 mM 1-acetylimidazole (AI), 2.5 mM biphenyl (GC reference standard), and 0.3 mM supramolecular catalyst (**14a** or **15a**). CO (1 atm) and appropriate amounts of benzyltriethylammonium chloride when indicated

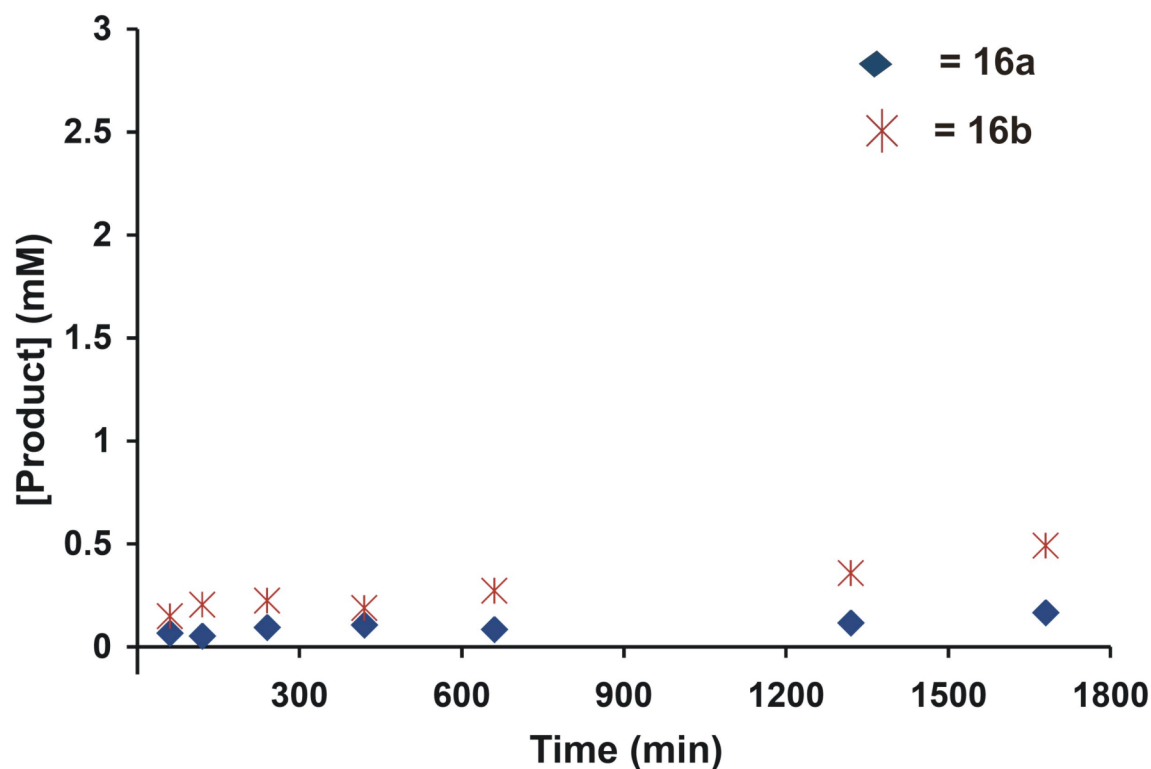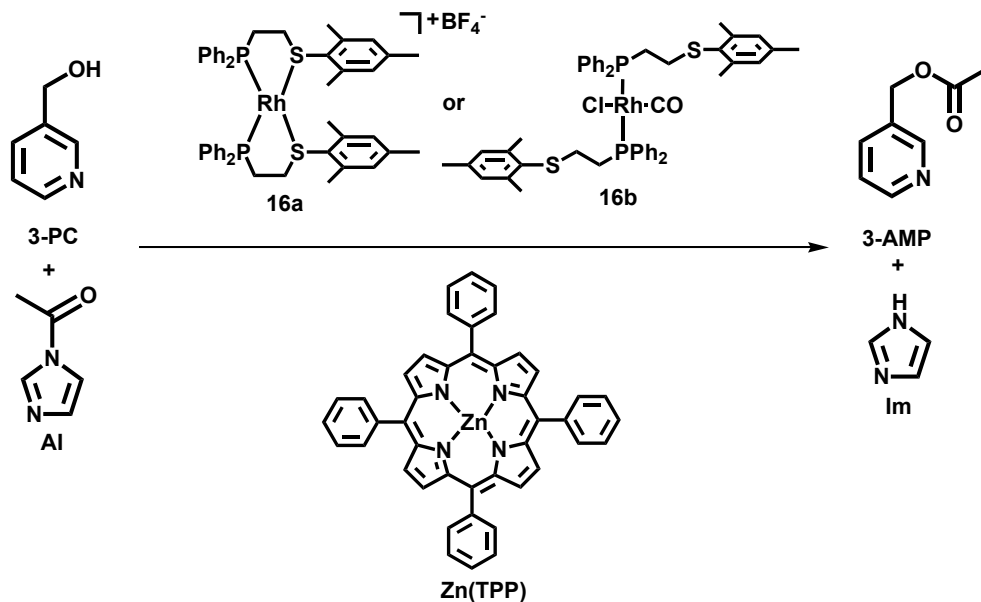

**Figure S6.** Formation 3-(acetoxymethyl)pyridine (3-AMP) plotted as concentration vs. time for [Zn(TPP) + 16a] and [Zn(TPP) + 16b]. Conditions: CH<sub>2</sub>Cl<sub>2</sub>, rt, 9 mM 3-pyridylcarbinol (3-PC), 6 mM 1-acetylimidazole (AI), 2.5 mM biphenyl (GC reference standard), 0.6 mM Rh<sup>I</sup>-monomer (16a or 16b), and 0.6 mM Zn(TPP). CO (1 atm) and appropriate amounts of benzyltriethylammonium chloride when indicated.



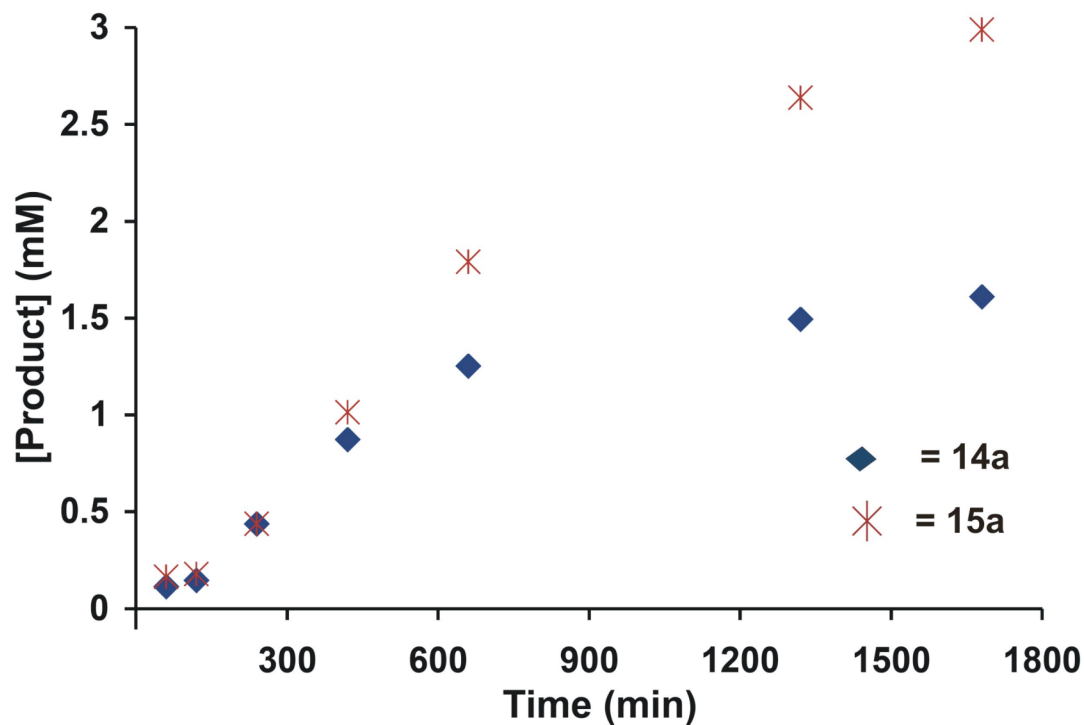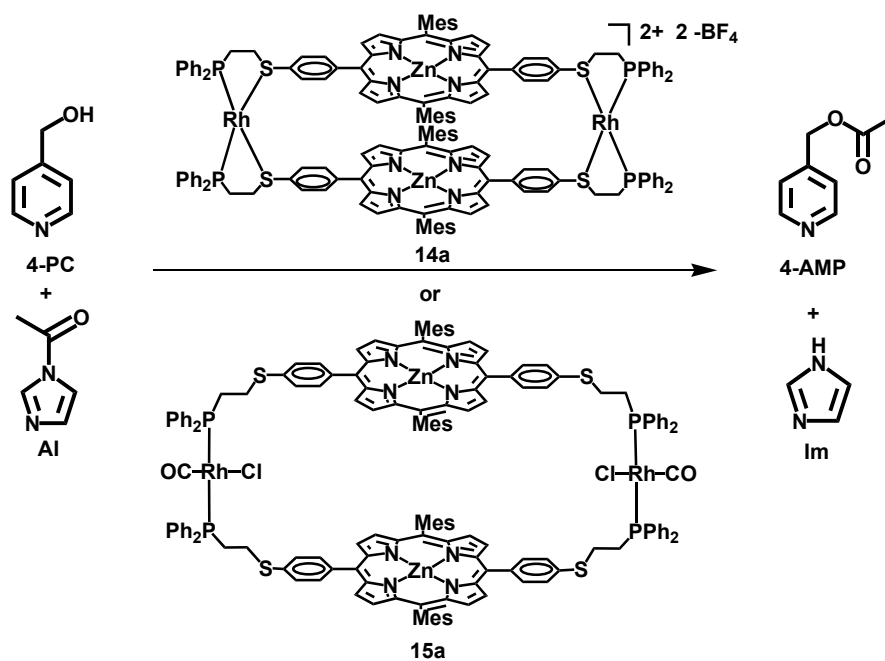

**Figure S7.** Formation of 4-(acetoxymethyl)pyridine (4-AMP) plotted as concentration vs. time for **14a** and **15a**. All data are uncorrected for background reactions. Conditions: CH<sub>2</sub>Cl<sub>2</sub>, rt, 9 mM 4-pyridylcarbinol (4-PC), 6 mM 1-acetylimidazole (AI), 2.5 mM biphenyl (GC reference standard), and 0.3 mM supramolecular catalyst (**14a** or **15a**). CO (1 atm) and appropriate amounts of benzyltriethylammonium chloride when indicated.

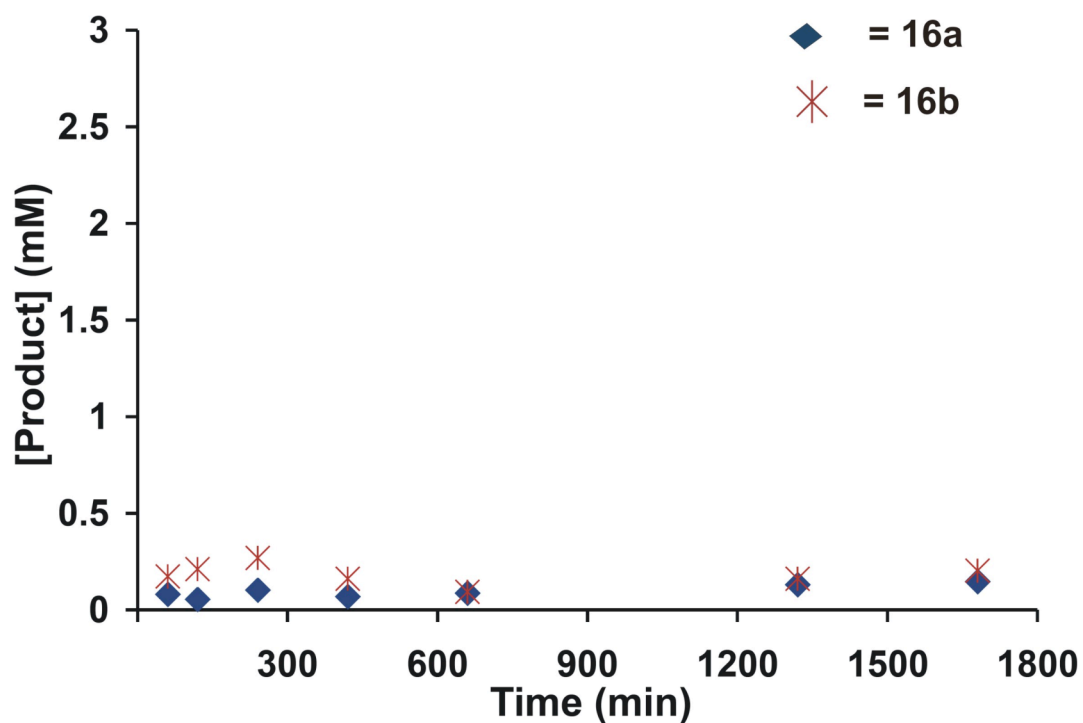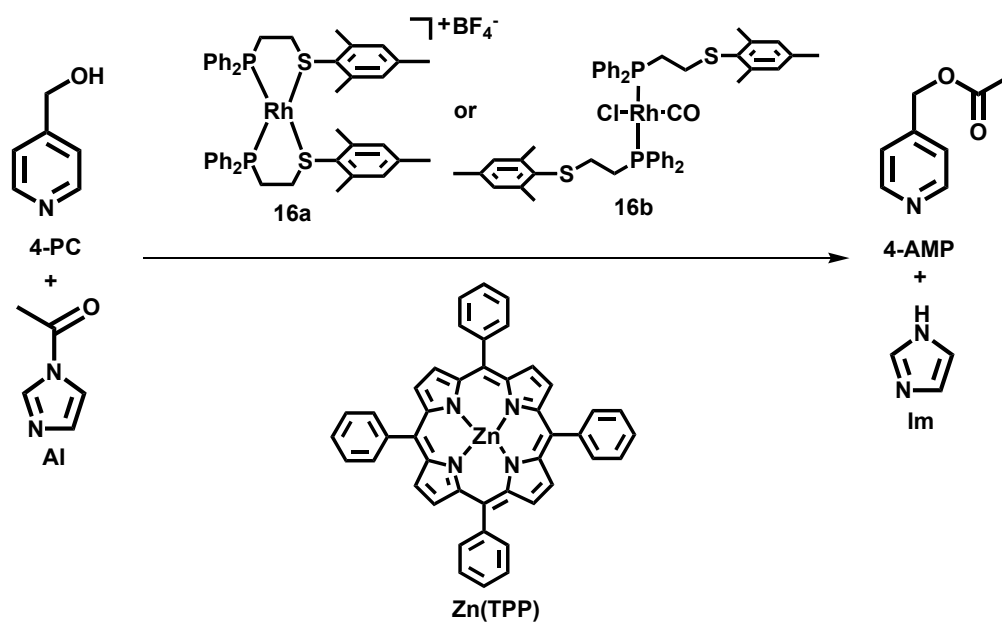

**Figure S8.** Formation 4-(acetoxymethyl)pyridine (4-AMP) plotted as concentration vs. time for [Zn(TPP) + 16a] and [Zn(TPP) + 16b]. Conditions:  $\text{CH}_2\text{Cl}_2$ , rt, 9 mM 4-pyridylcarbinol (4-PC), 6 mM 1-acetylimidazole (AI), 2.5 mM biphenyl (GC reference standard), 0.6 mM  $\text{Rh}^{\text{I}}$ -monomer (16a or 16b), and 0.6 mM Zn(TPP). CO (1 atm) and appropriate amounts of benzyltriethylammonium chloride when indicated.
